# Supplementary material for: Adsorption of atmospheric gas molecules (NH3, H2S, CO, H2, CH4, NO, NO2, C6H6 and C3H6O) on two-dimensional polyimide with hydrogen bonding: a first-principles study
Source: Royal Society of Chemistry journal article supplement (doi:10.1039/d0nj06013e), 2021-01-01
Supplement: d0nj06013e1.pdf [file d0nj06013e1.pdf]

## Supporting Information

### **Adsorption of the Atmospheric Gas Molecules (NH<sub>3</sub>, H<sub>2</sub>S, CO, H<sub>2</sub>, CH<sub>4</sub>, NO, NO<sub>2</sub>, C<sub>6</sub>H<sub>6</sub> and C<sub>3</sub>H<sub>6</sub>O) on Two-Dimensional Polyimide with Hydrogen Bonding: A First-principles Study**

Sujing Yu<sup>a</sup>, Dongzhi Zhang <sup>\*a</sup>, Wenjing Pan<sup>a</sup>, Jingbin Zeng <sup>\*b</sup>

<sup>a</sup> College of Control Science and Engineering, China University of Petroleum (East China), Qingdao 266580, China

<sup>b</sup> College of Science, China University of Petroleum (East China), Qingdao 266580, China

\*Corresponding authors: Dongzhi Zhang, Jingbin Zeng

E-mail address: dzzhang@upc.edu.cn, xmuzjb@163.com

Tel: +86-532-86982928

Fax: +86-532-86983326

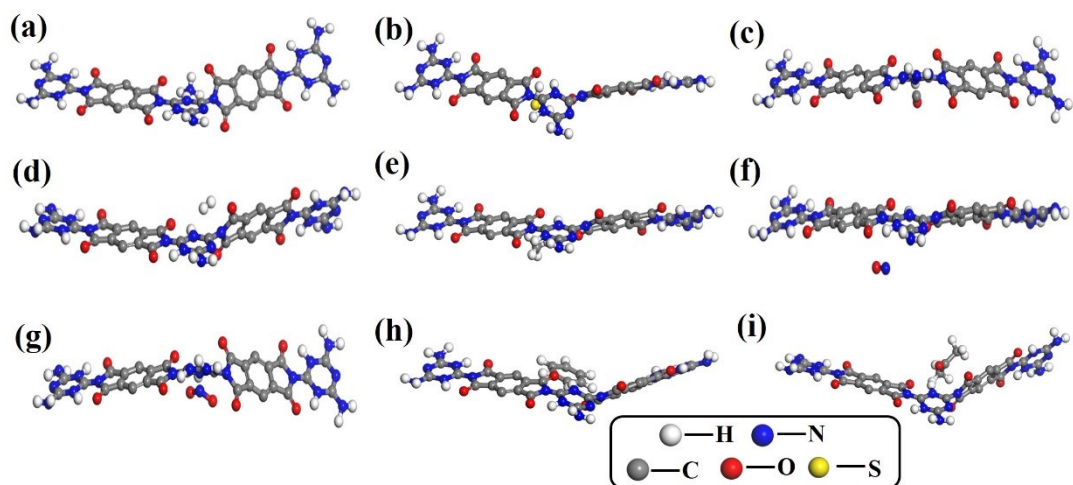

**Figure S1.** Side view of optimized geometric structures of (a)  $\text{NH}_3$ , (b)  $\text{H}_2\text{S}$ , (c)  $\text{CO}$ , (d)  $\text{H}_2$ , (e)  $\text{CH}_4$ , (f)  $\text{NO}$ , (g)  $\text{NO}_2$ , (h)  $\text{C}_6\text{H}_6$ , (i)  $\text{C}_3\text{H}_6\text{O}$  gas molecules adsorbed on position 1 of polyimide (1-2DPI).

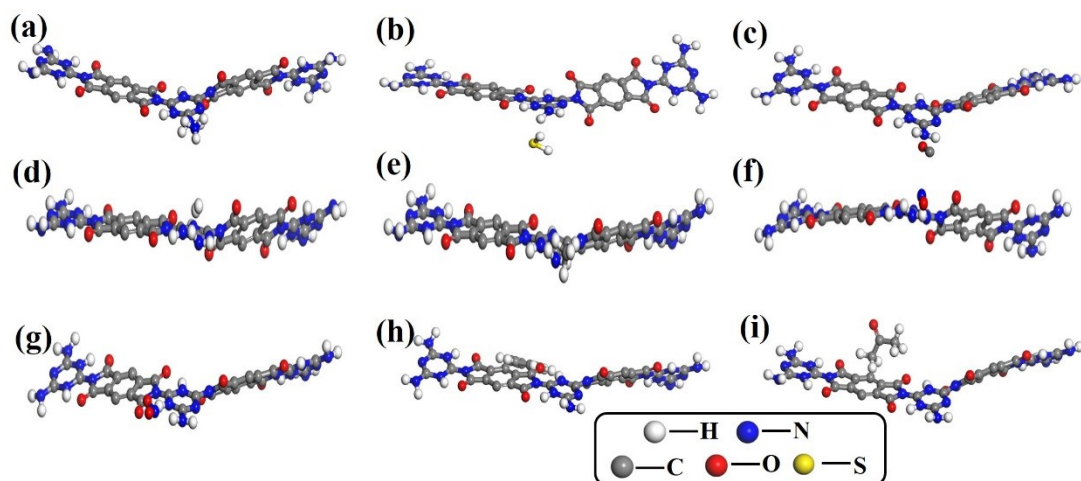

**Figure S2.** Side view of optimized geometric structures of (a)  $\text{NH}_3$ , (b)  $\text{H}_2\text{S}$ , (c)  $\text{CO}$ , (d)  $\text{H}_2$ , (e)  $\text{CH}_4$ , (f)  $\text{NO}$ , (g)  $\text{NO}_2$ , (h)  $\text{C}_6\text{H}_6$ , (i)  $\text{C}_3\text{H}_6\text{O}$  gas molecules adsorbed on position 2 of polyimide (2-2DPI).

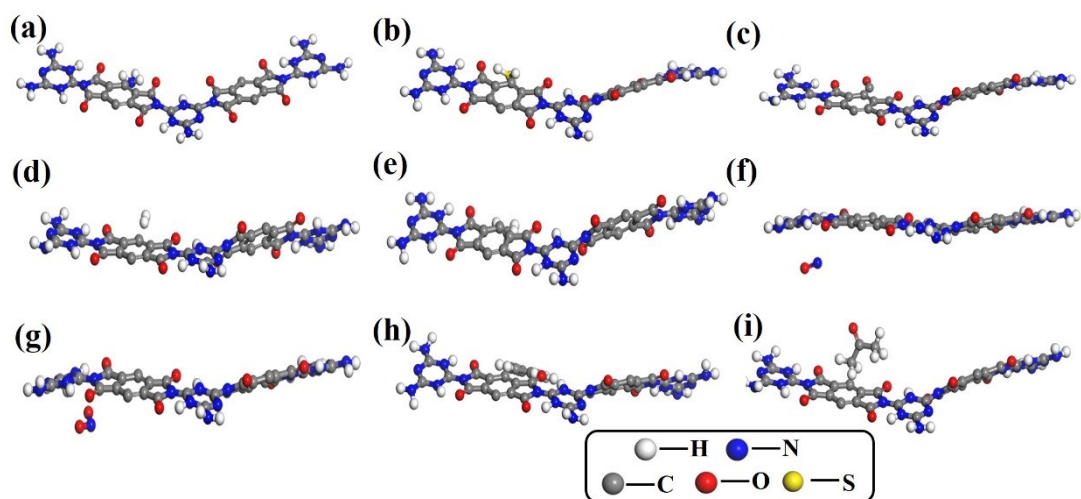

**Figure S3.** Side view of optimized geometric structures of (a) NH<sub>3</sub>, (b) H<sub>2</sub>S, (c) CO, (d) H<sub>2</sub>, (e) CH<sub>4</sub>, (f) NO, (g) NO<sub>2</sub>, (h) C<sub>6</sub>H<sub>6</sub>, (i) C<sub>3</sub>H<sub>6</sub>O gas molecules adsorbed on position 3 of polyimide (3-2DPI).

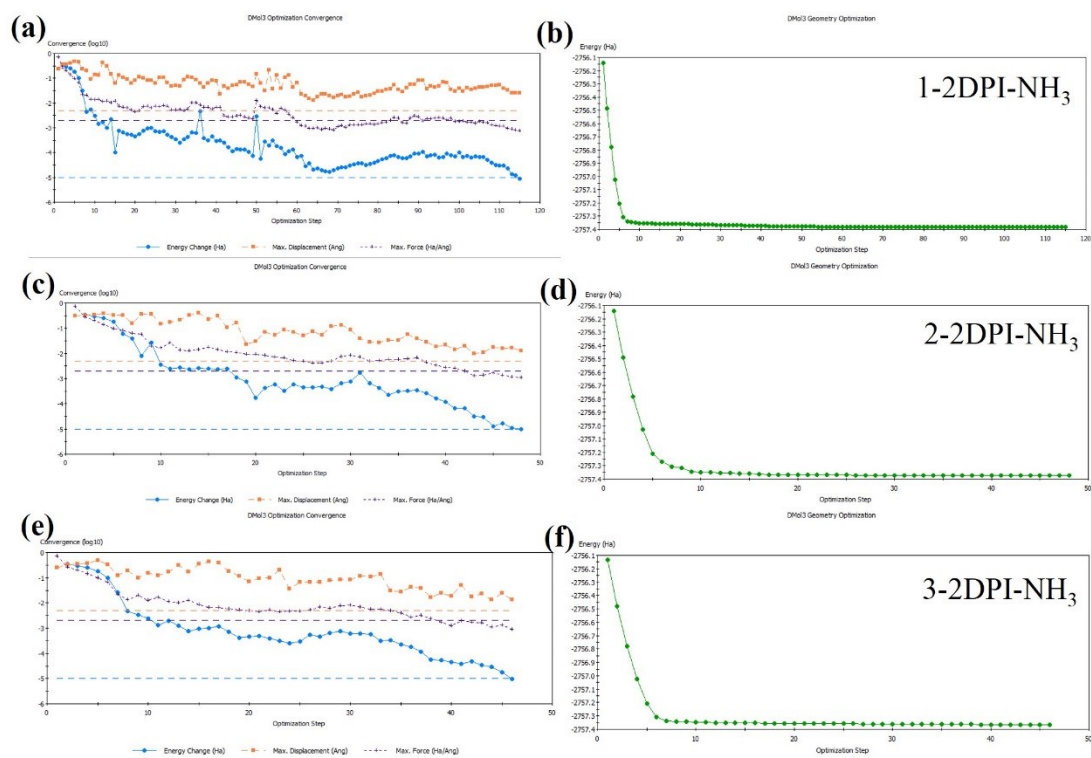

**Figure S4.** The relationship between convergence, energies and optimization step of NH<sub>3</sub> adsorption system.

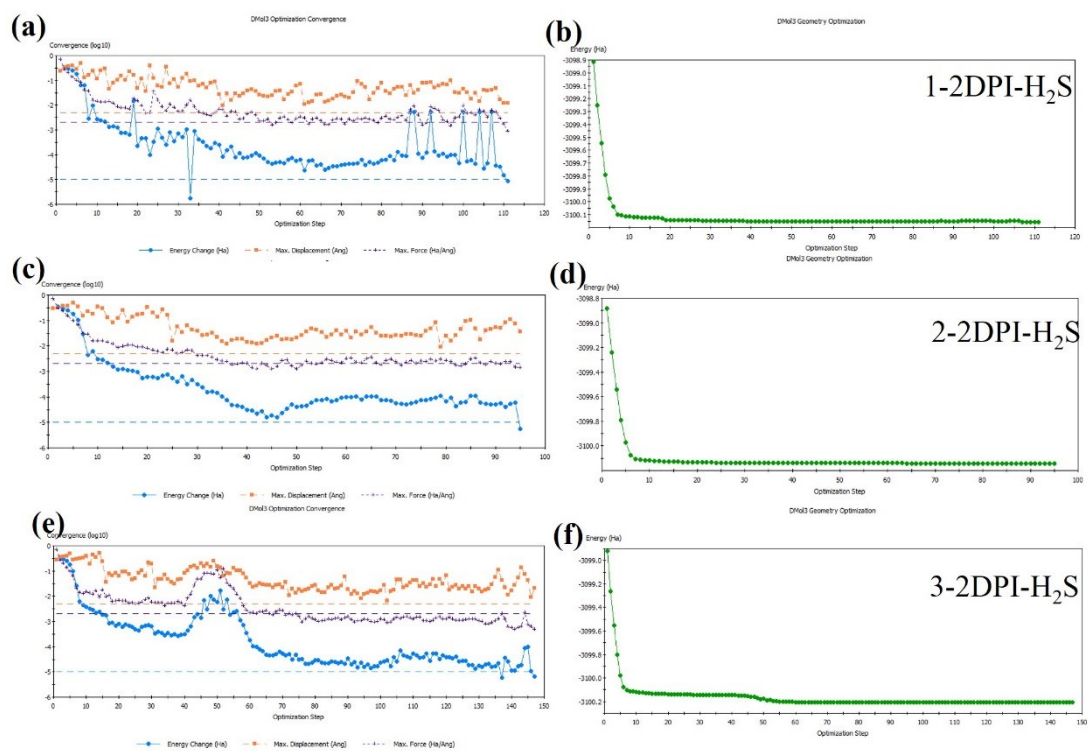

**Figure S5.** The relationship between convergence, energies and optimization step of H<sub>2</sub>S adsorption system.

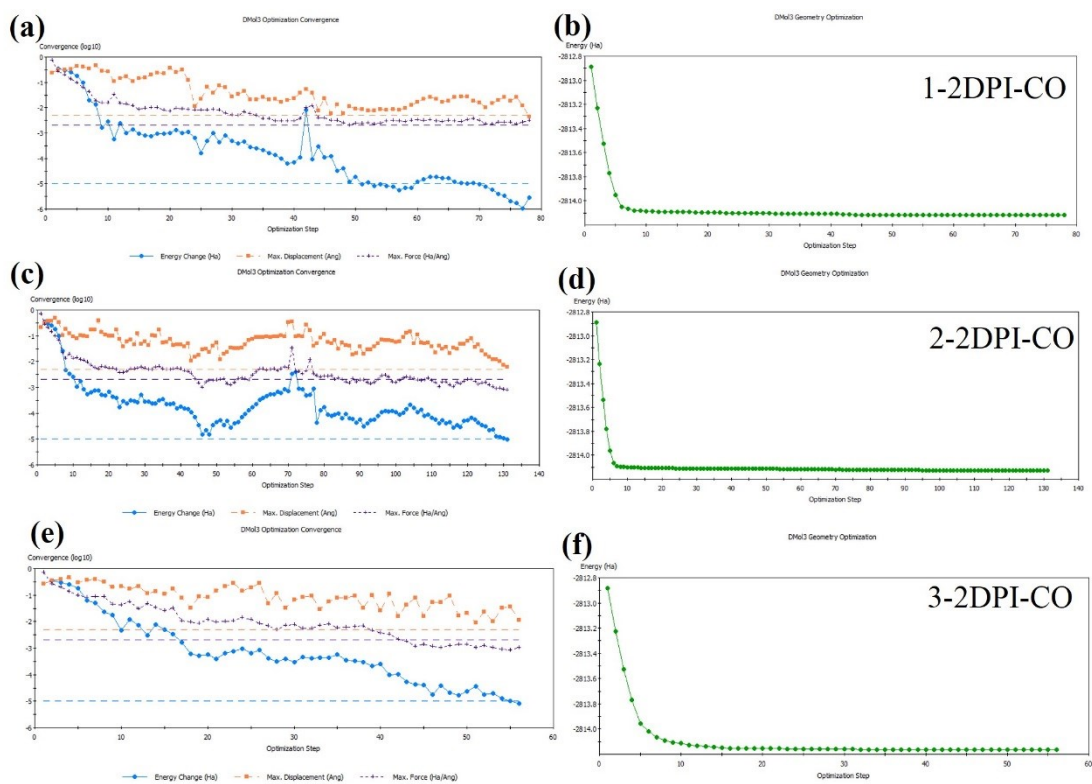

**Figure S6.** The relationship between convergence, energies and optimization step of CO adsorption system.
